# Supplementary material for: Smad3 Regulates Neuropilin 2 Transcription by Binding to its 5′ Untranslated Region
Source: PubMed Central journal article supplement — J Am Heart Assoc. 2020 Apr 14;9(8):e015487. doi: 10.1161/JAHA.119.015487 (PMC7428547; doi:10.1161/jaha.119.015487), 2020-04-14
Supplement: JAH3-9-e015487-s001.pdf [file JAH3-9-e015487-s001.pdf]

# **SUPPLEMENTAL MATERIAL**

**Table S1. Primers used for qRT-PCR.**

| Target                 | Forward                   | Reverse                  |
|------------------------|---------------------------|--------------------------|
| <b>Gene expression</b> |                           |                          |
| Smad3                  | GCCTGTGCTGGAACATCATC      | TTGCCCTCATGTGTGCTCTT     |
| NrP2                   | GCATGGCAAAAACCACAAGGTAT   | TGGAGCGTGGAGCTTGTTCA     |
| CD68                   | TCAGCTTTGGATTCATGCAG      | AGGTGGACAGCTGGTGAAAG     |
| ACTA2                  | TGACAATGGCTCTGGGCTCTGTAA  | TTCGTCACCCACGTAGCTGTCTTT |
| GAPDH                  | CATGTTTCGTCATGGGTGTGAACCA | ATGGCATGGACTGTGGTCATGAGT |
| <b>ChIP</b>            |                           |                          |
| S1                     | TCTGAGATTAACAGTGTGA       | CTTAACTGTTATTTACACT      |
| S2                     | TAGTAAACGCAGCGAGTGT       | GGTAGCGAGCCGGTCGGCA      |
| S3                     | TCGGCCTGAAAAGGCAGTG       | TGTCTGTGCGGCTGAGGAT      |
| S4                     | GTGTTCTCTTCCCGGCTTGT      | TCCTGGTGGCTTGTCTTCAC     |

**Table S2. Primers for NrP2 promoter and/or 5'UTR reporter clone.**

| Cloned region                            | Forward                                             | Reverse                                              |
|------------------------------------------|-----------------------------------------------------|------------------------------------------------------|
| Promoter<br>(-1.5k ~ 0 bp)               | GACTCATACAGCTGGCAGAGC<br>T<br>CGTGTGATACTCAGCCTGTG  | GACTCATACAGCTAGCTAAGC<br>T<br>TCTCCCCACTGCCTTTTCA    |
| Promoter+5'UTR<br>R (-1.5k ~ +791<br>bp) | GACTCATACAGCTGGCAGAGC<br>T<br>CGTGTGATACTCAGCCTGTGG | GACTCATACAGCTAGCTAAGC<br>T<br>TCTTTCCAGAGCTGGGTTTCGT |
| 5' UTR<br>(0 ~ +791 bp)                  | GACTCATACAGCTGGCAGACG<br>T<br>CCCTGAAAAGGCAGTGGGGAG | GACTCATACAGCTAGCTCCAT<br>G<br>GCTTTCCAGAGCTGGGTTTCGT |

**Table S3. Antibodies for Western blotting.**

| Antibody       | Company                     | Catalog number | Dilution                 |
|----------------|-----------------------------|----------------|--------------------------|
| Smad3          | Abcam                       | ab40854        | 1:1000 (WB); 1:500 (IHC) |
| Phospho-smad3  | Thermofisher Scientific     | MA5-14936      | 1:100 (CHIP)             |
| Phospho-smad3  | Abcam                       | ab52903        | 1:2000 (WB)              |
| Nrp2           | Thermofisher scientific     | PA5-47274      | 1:100 (IHC); 1:1000 (WB) |
| CD68           | Santa Cruz                  | sc-20060       | 1:200 (WB)               |
| aSMA           | Abcam                       | ab5694         | 1:2000 (WB)              |
| GAPDH          | Cell Signaling Technologies | 2118S          | 1:3000                   |
| $\beta$ -ACTIN | Abcam                       | ab6276         | 1:3000                   |



Figure S1. Reduced Smad3 protein levels in Smad3-haploinsufficient mice (*vs* WT).

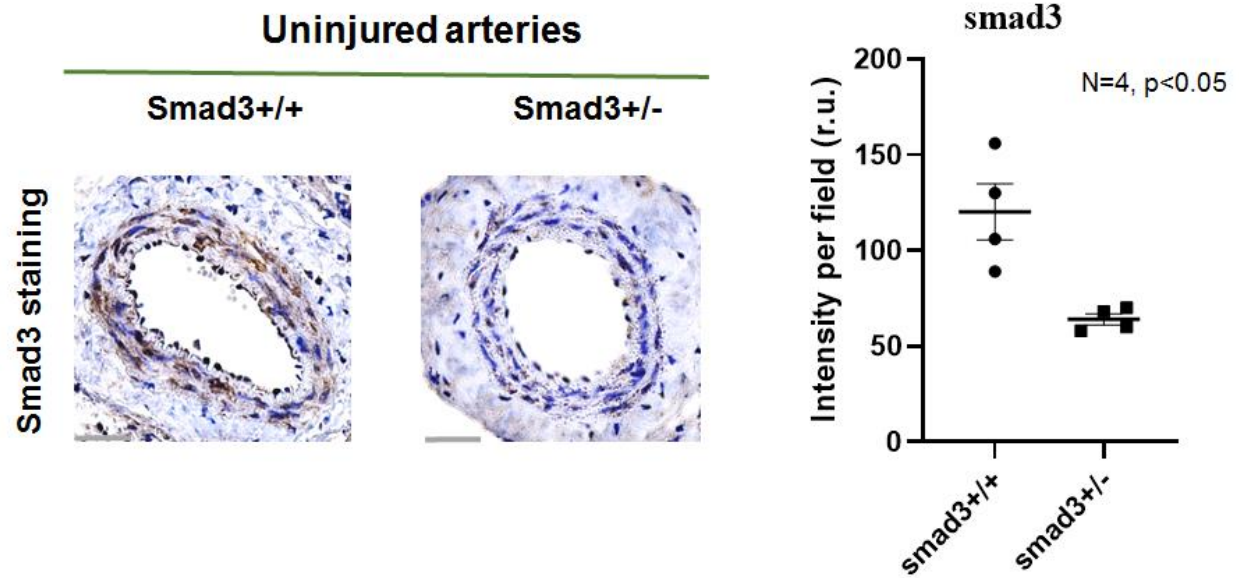

Uninjured mouse femoral artery sections were used for immunostaining of Smad3, which was performed as described in Figure 1. Scale bar: 50  $\mu$ m.

**Figure S2. NRP2 expression is stimulated by TGF- $\beta$  treatment of human AoSMCs.**

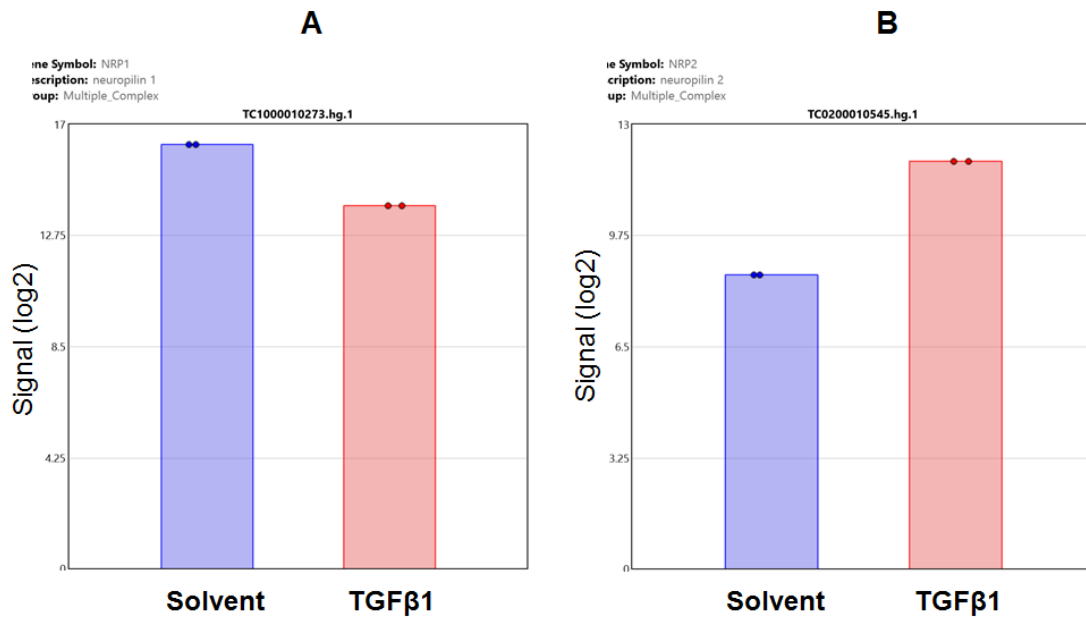

In order to determine the different gene sets responding to TGF- $\beta$  1 stimulation, human AoSMCs were cultured, starved, and then treated with solvent control or TGF $\beta$ 1 (10 ng/ml) for 20 hours. The cells were then used for Affymetrix gene array. Relative NRP1 and NRP2 gene expression levels are presented as log<sub>2</sub> values.

**Figure S3. Smad3 but not Smad2 silencing down-regulates NRP2 expression.**

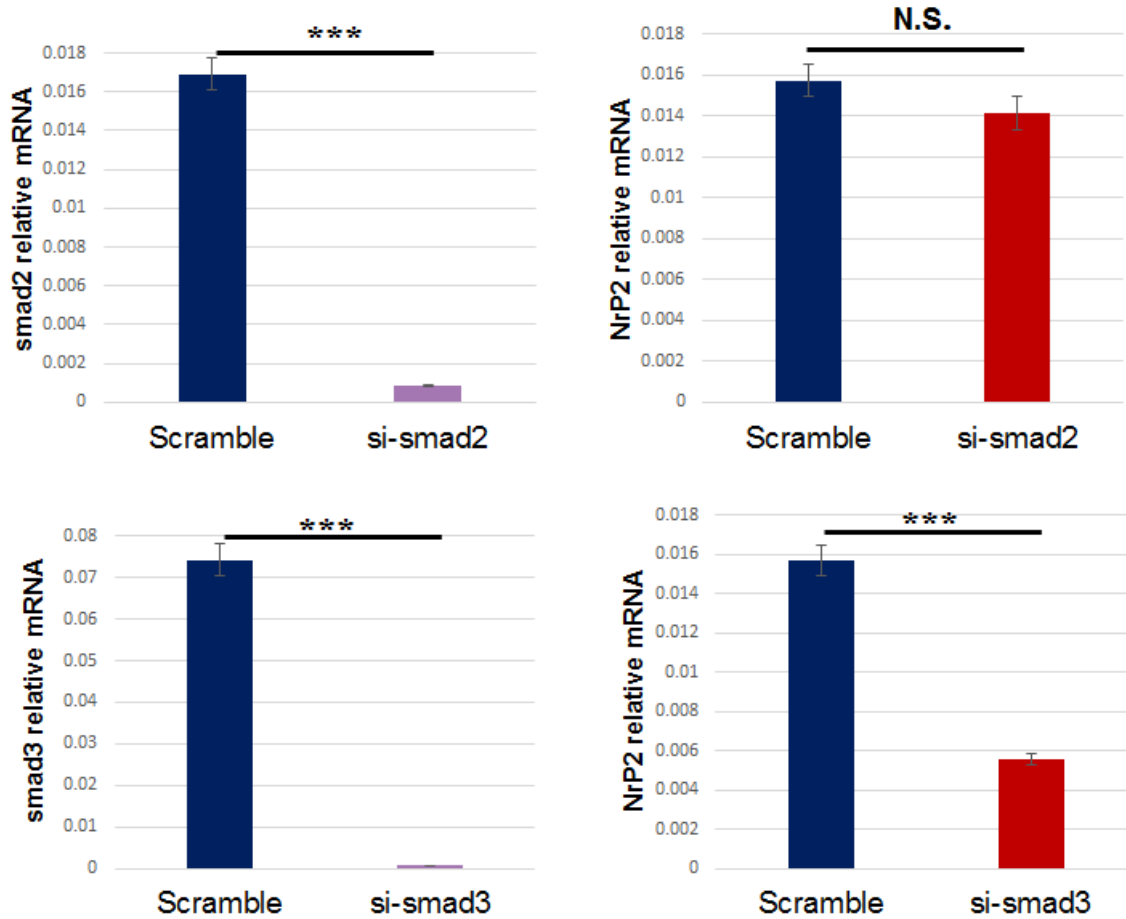

To examine the effect of knockdown of smad2 or smad3 on expression of NRP2, AoSMCs were cultured, transfected with Smad2- or Smad3-specific siRNA. Cells were collected 48 hours post transfection for qPCR assay.
